# Supplementary material for: Symmetry-Engineering-Induced In-Plane Polarization Enhancement in Ta2NiS5/CrOCl van der Waals Heterostructure
Source: MDPI journal article supplement (doi:10.3390/nano13233050), 2023-11-29
Supplement: s1 [file s1]

*Supplementary Materials*

# **Symmetry-Engineering-Induced In-Plane Polarization Enhancement in Ta<sub>2</sub>NiS<sub>5</sub>/CrOCl van der Waals Heterostructure**

Yue Su,<sup>1,2</sup> Peng Chen,<sup>3</sup> Xiangrui Xu,<sup>1</sup> Yufeng Zhang,<sup>1</sup> Weiwei Cai,<sup>1</sup> Gang Peng,<sup>2</sup> Xueao Zhang,<sup>1\*</sup> Chuyun Deng<sup>2\*</sup>

1 College of Physical Science and Technology, Xiamen University, Xiamen 361005, China

2 College of Science, National University of Defense Technology, Changsha 410073, China

3. Songshan Lake Materials Laboratory, Dongguan 523808, China

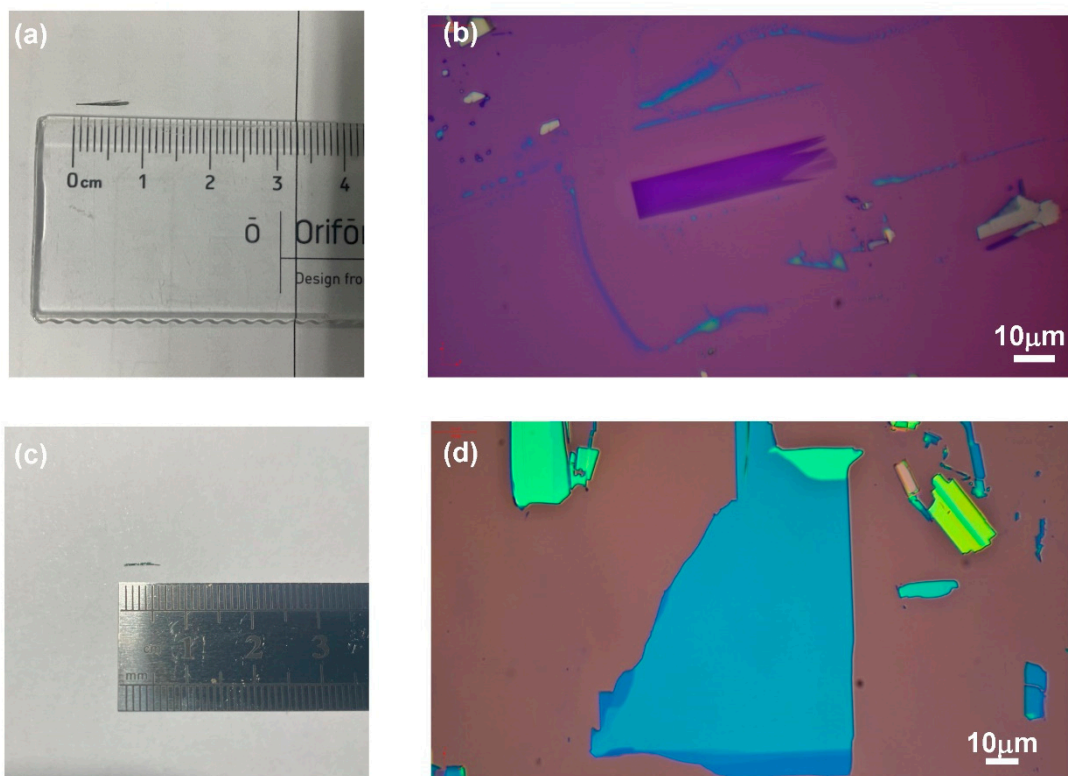

Figure S1. Photograph of bulk (a)  $\text{Ta}_2\text{NiS}_5$  and (c)  $\text{CrOCl}$  crystal. Optical microscopy image of few-layer (b)  $\text{Ta}_2\text{NiS}_5$  and (d)  $\text{CrOCl}$  flake. The scale bar is  $10\mu\text{m}$ .

Table S1. Comparison of Raman frequencies of  $\text{Ta}_2\text{NiS}_5$  and  $\text{Ta}_2\text{NiS}_5/\text{CrOCl}$ .

|                                        | $\text{B}_{2g,a\text{-axis}}$ | ${}^2\text{A}_{g,a\text{-axis}}$ | ${}^3\text{A}_{g,a\text{-axis}}$ | $\text{B}_{2g,c\text{-axis}}$ | ${}^2\text{A}_{g,c\text{-axis}}$ | ${}^3\text{A}_{g,c\text{-axis}}$ |
|----------------------------------------|-------------------------------|----------------------------------|----------------------------------|-------------------------------|----------------------------------|----------------------------------|
| $\text{Ta}_2\text{NiS}_5$              | $61.6\text{cm}^{-1}$          | $123.7\text{cm}^{-1}$            | $146.1\text{cm}^{-1}$            | $60.7\text{cm}^{-1}$          | $123.7\text{cm}^{-1}$            | $146\text{cm}^{-1}$              |
| $\text{Ta}_2\text{NiS}_5/\text{CrOCl}$ | $61.2\text{cm}^{-1}$          | $124.1\text{cm}^{-1}$            | $146.5\text{cm}^{-1}$            | $60.9\text{cm}^{-1}$          | $123.9\text{cm}^{-1}$            | $146.4\text{cm}^{-1}$            |
| Frequency shift                        | $-0.4\text{cm}^{-1}$          | $0.4\text{cm}^{-1}$              | $0.4\text{cm}^{-1}$              | $0.2\text{cm}^{-1}$           | $0.2\text{cm}^{-1}$              | $0.4\text{cm}^{-1}$              |

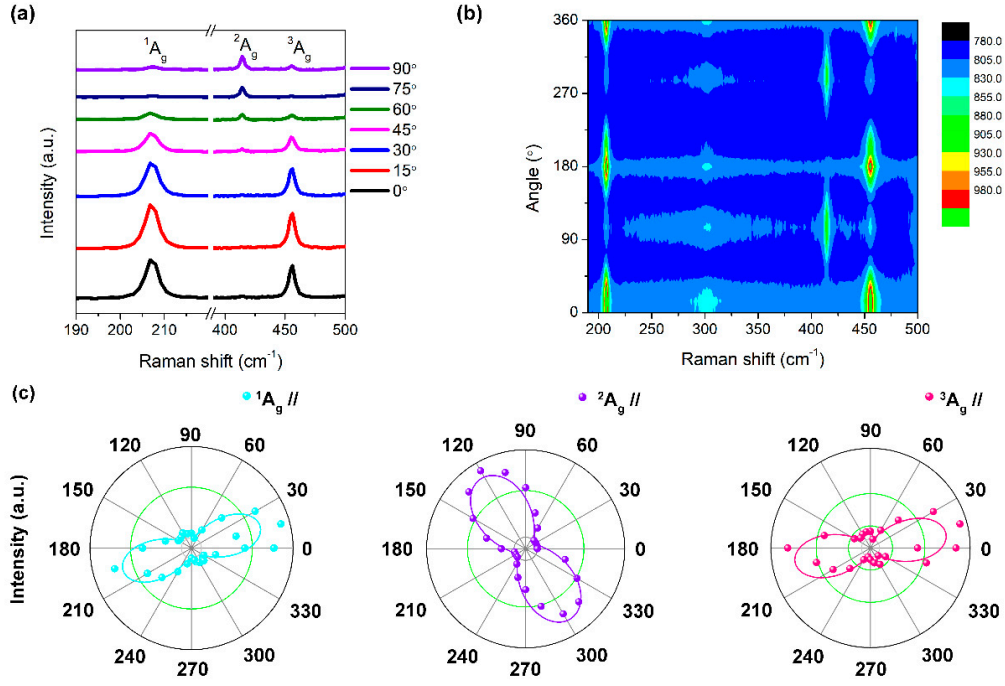

Figure S2. In parallel configurations, (a) polarized Raman spectra, (b) corresponding contour map and (c) polar plots of CrOCl flake.

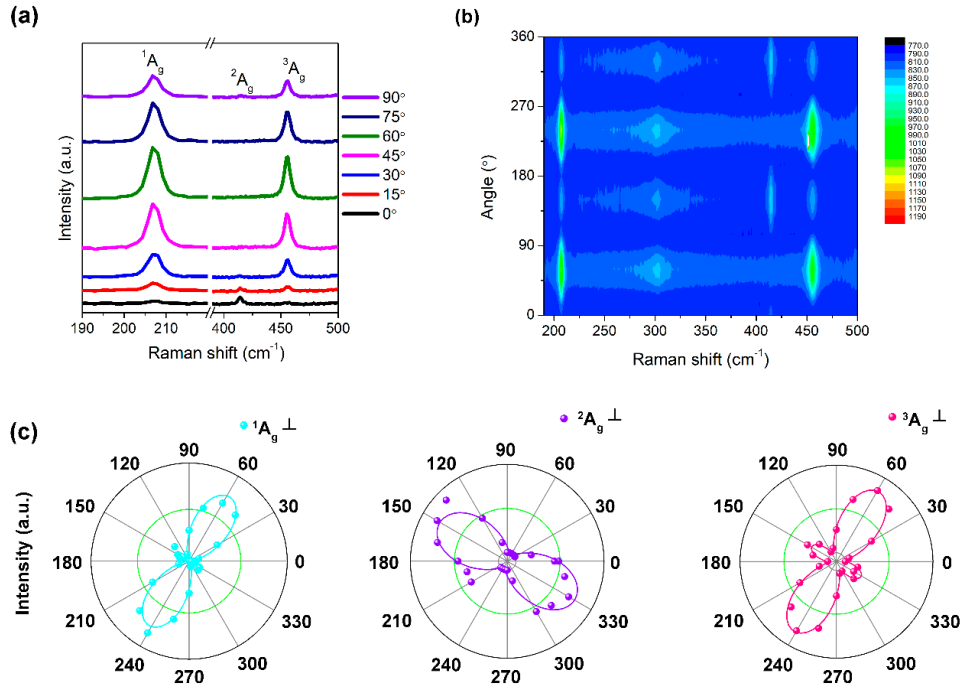

Figure S3. In perpendicular configurations, (a) polarized Raman spectra, (b) corresponding contour map and (c) polar plots of CrOCl flake.

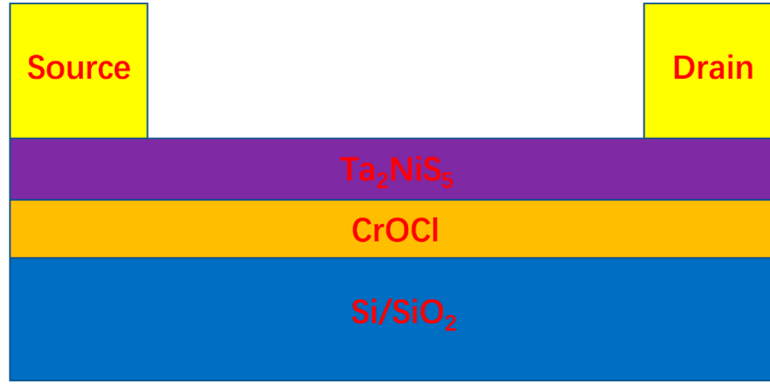

Figure S4. Schematic diagram of Ta<sub>2</sub>NiS<sub>5</sub>/CrOCl device in side view.

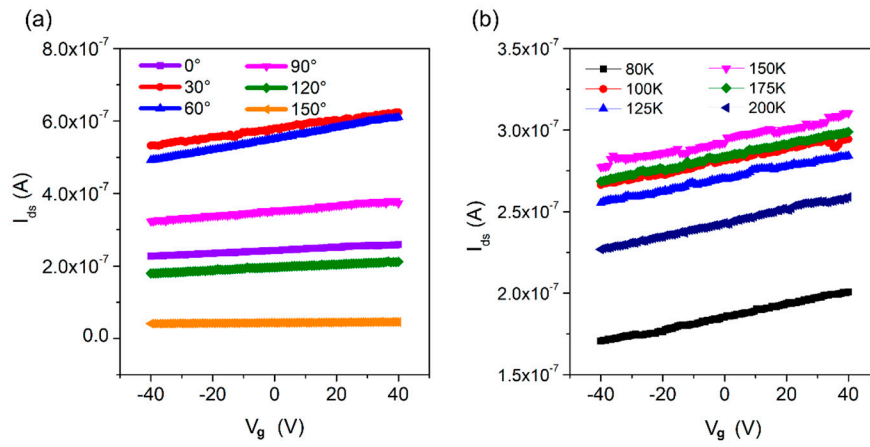

Figure S5. (a) Transfer characteristic curves of Ta<sub>2</sub>NiS<sub>5</sub>/CrOCl along *a*-axis at different temperatures. (b) Transfer characteristic curves of Ta<sub>2</sub>NiS<sub>5</sub>/CrOCl along different angles at 200K.

Table S2. Comparison of the anisotropy ratio of Ta<sub>2</sub>NiS<sub>5</sub> and Ta<sub>2</sub>NiS<sub>5</sub>/CrOCl heterostructure.

| Materials                               | $\sigma_a/\sigma_c$ | $\mu_a/\mu_c$ | Reference |
|-----------------------------------------|---------------------|---------------|-----------|
| Ta <sub>2</sub> NiS <sub>5</sub>        | 1.78                | /             | [1]       |
| Ta <sub>2</sub> NiS <sub>5</sub>        | 2.1                 | 2.7           | This work |
| Ta <sub>2</sub> NiS <sub>5</sub> /CrOCl | 15                  | 32            | This work |

#### References:

1. Li, L.; Gong, P.; Wang, W.; Deng, B.; Pi, L.; Yu, J.; Zhou, X.; Shi, X.; Li, H.; Zhai, T. Strong In-Plane Anisotropies of Optical and Electrical Response in Layered Dimetal Chalcogenide. *ACS Nano* **2017**, *11*, 10264-10272, doi:10.1021/acsnano.7b04860.
